# Supplementary material
Source: MDPI journal article supplement (https://www.mdpi.com/2571-6255/5/1/26)

**Figure S1:** Marginal effects of variables predicting above ground carbon pools with 90% confidence intervals.

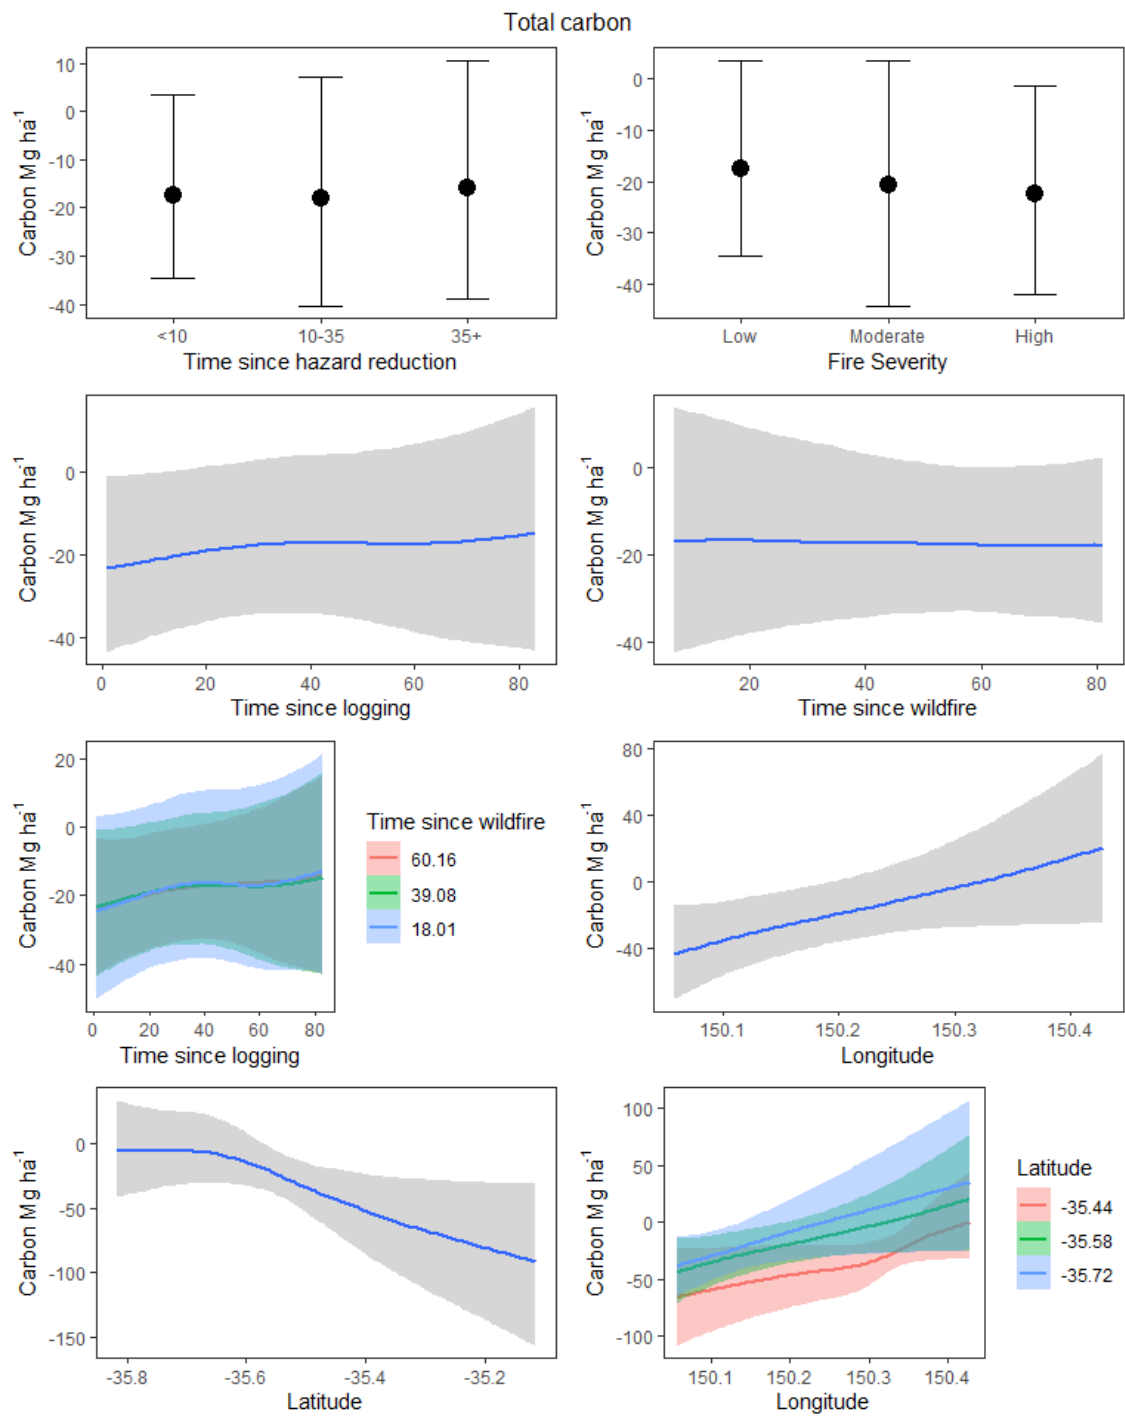

# Tree carbon

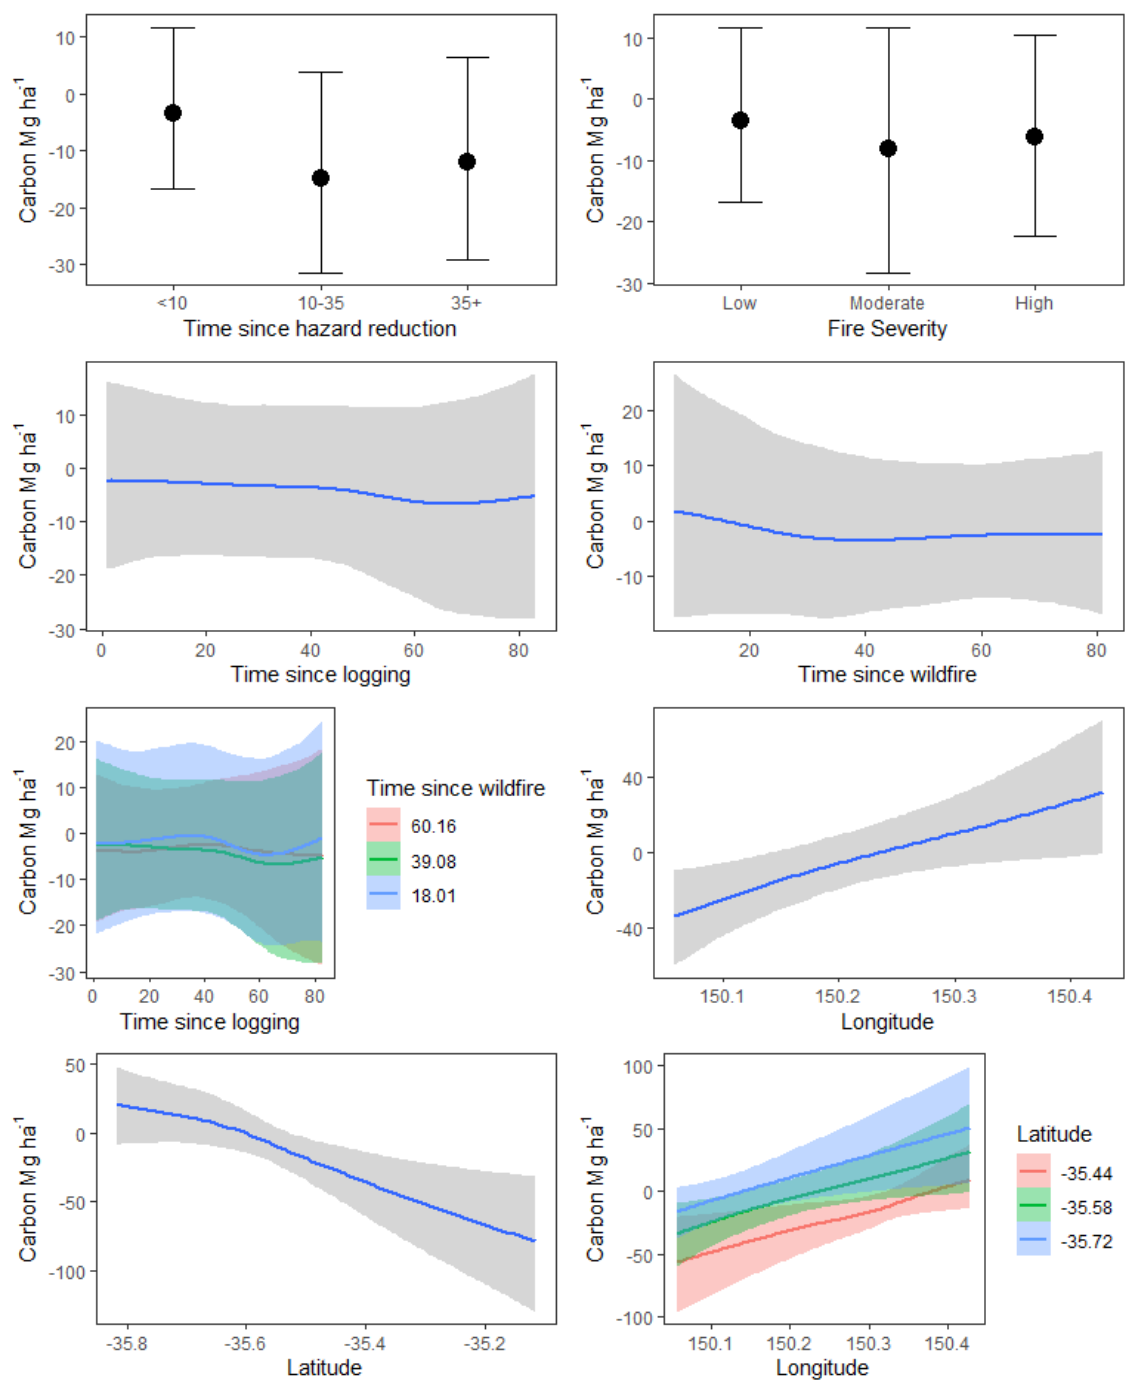

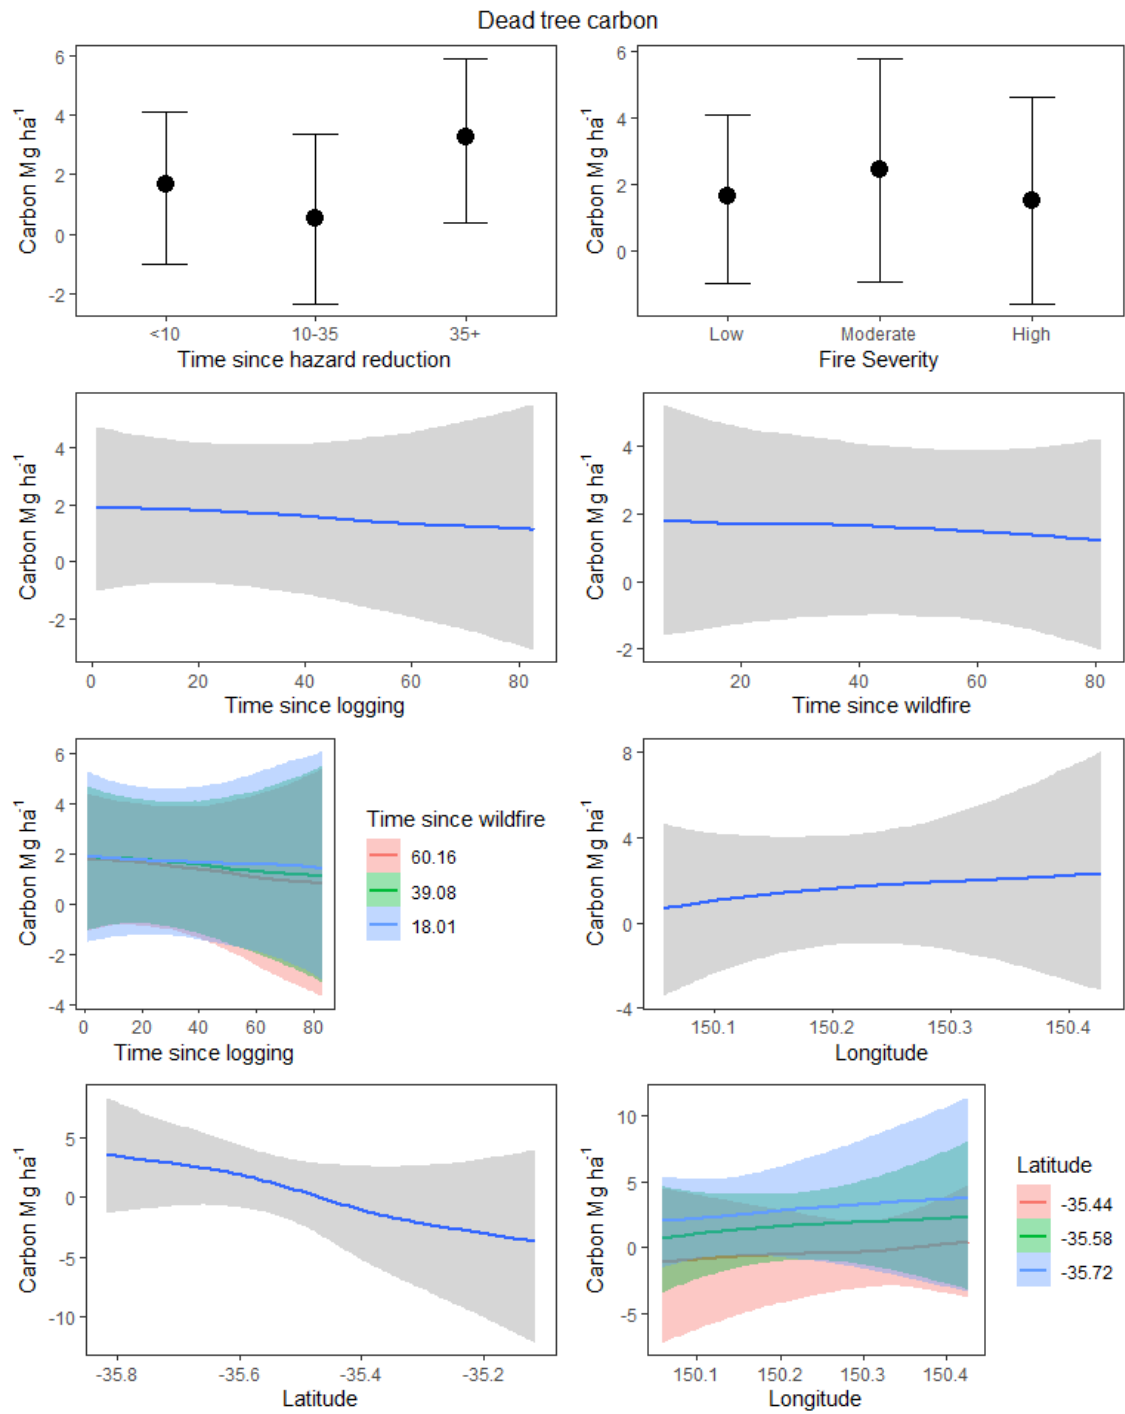

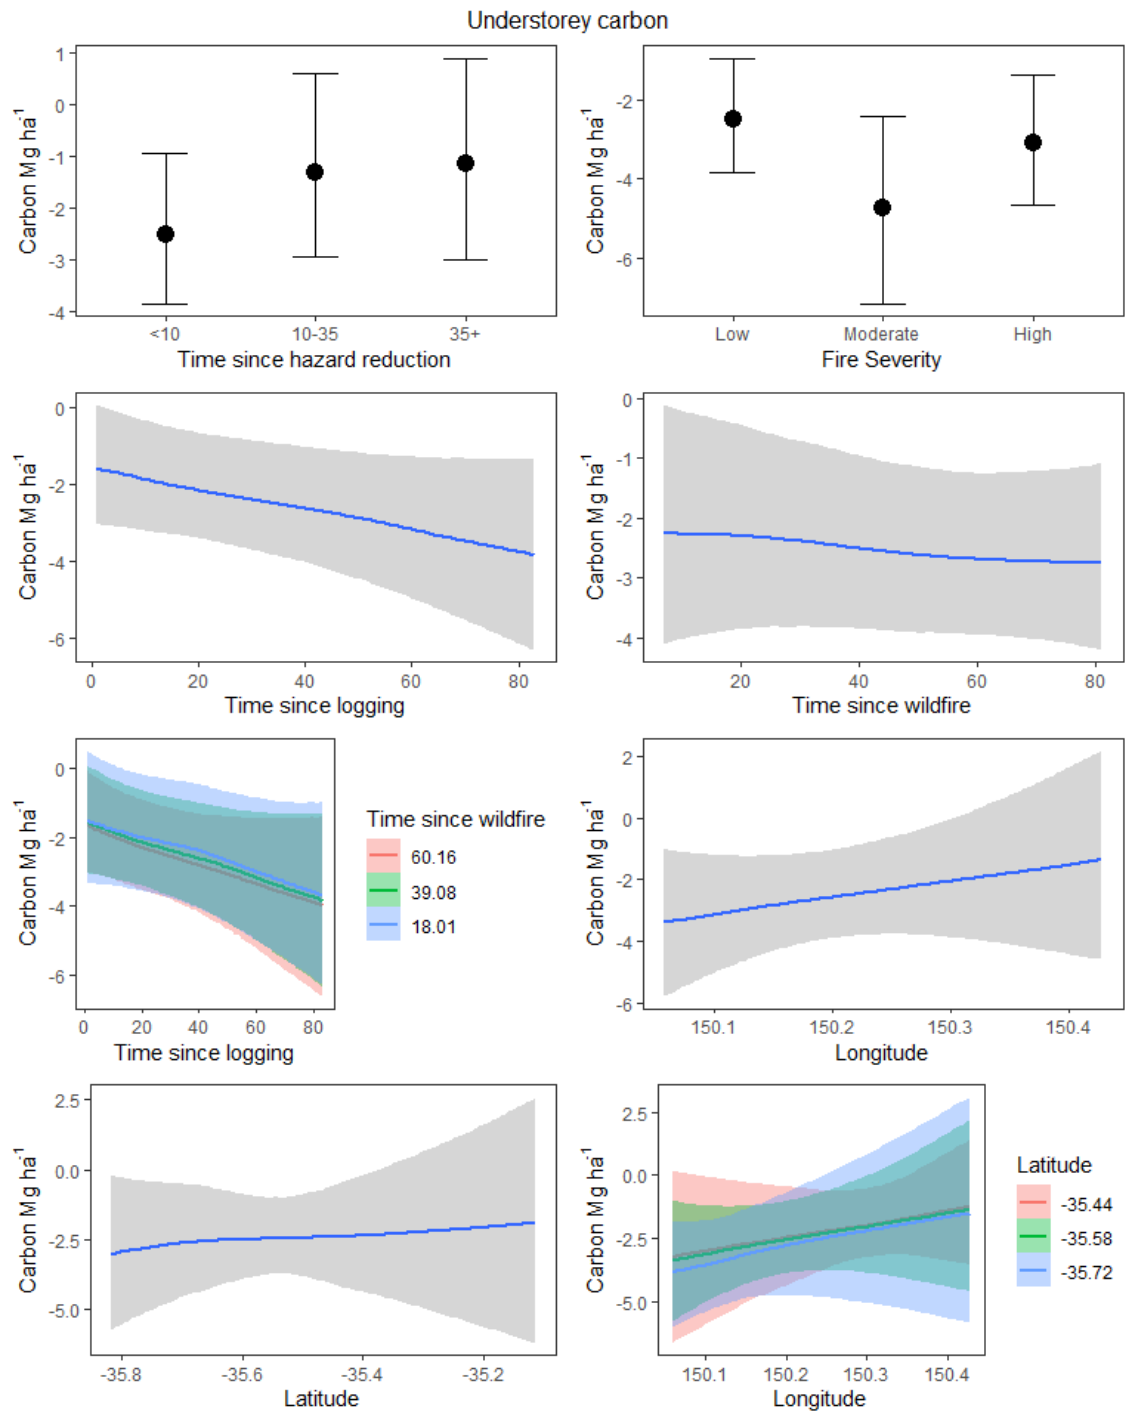

# Coarse woody debris carbon

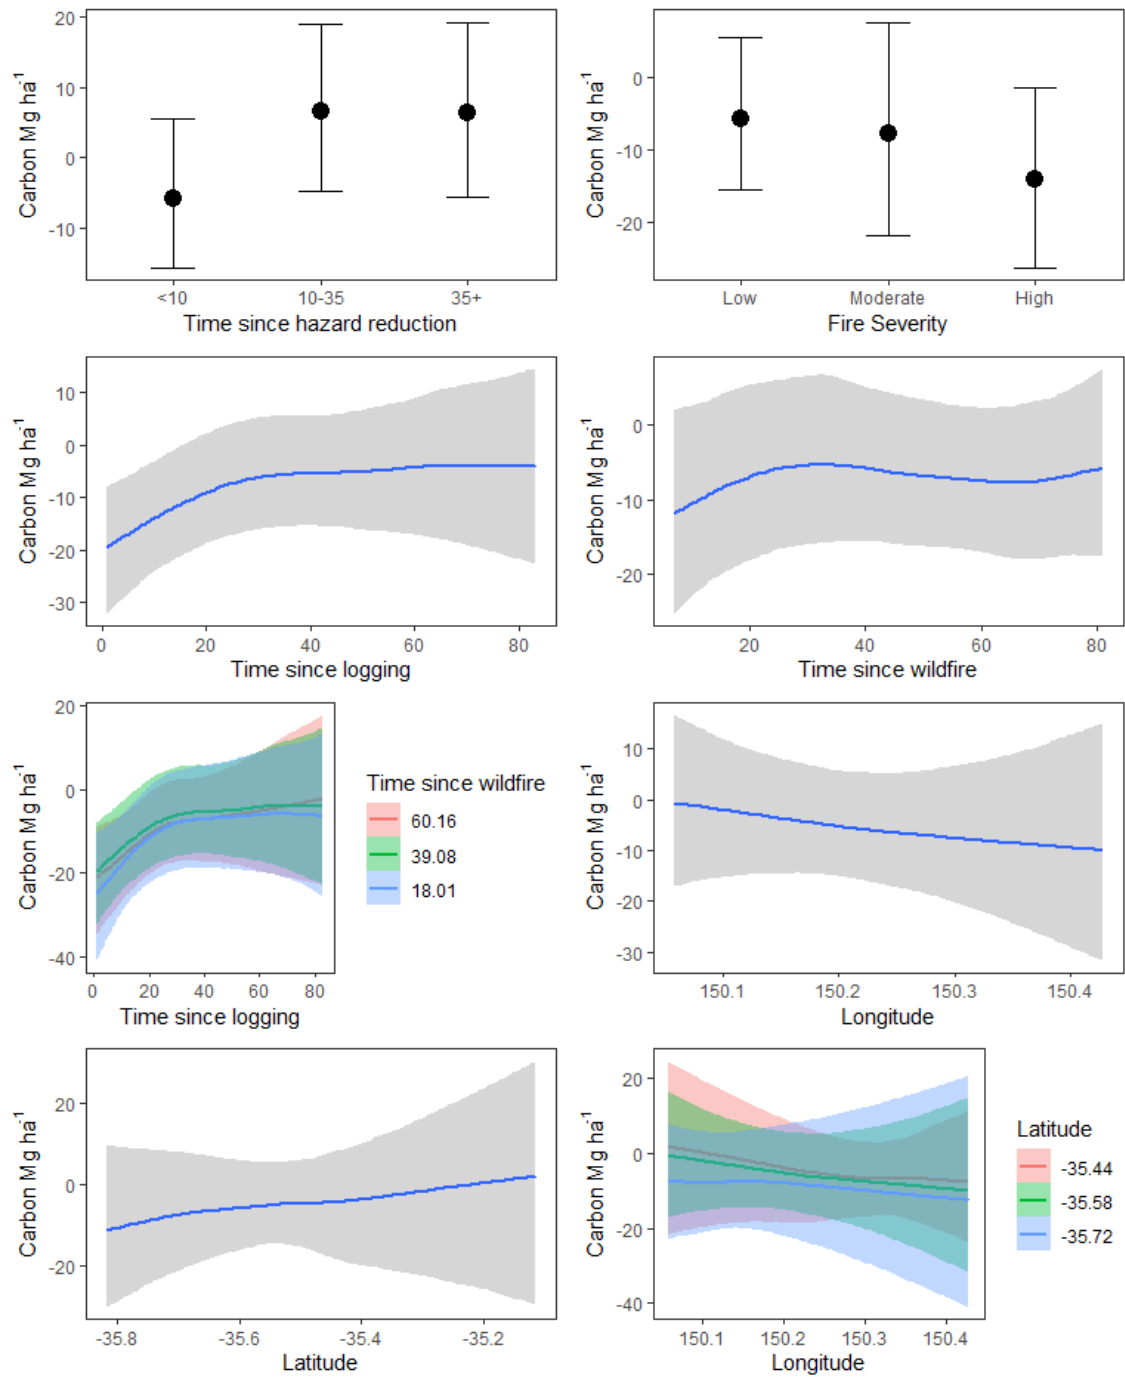

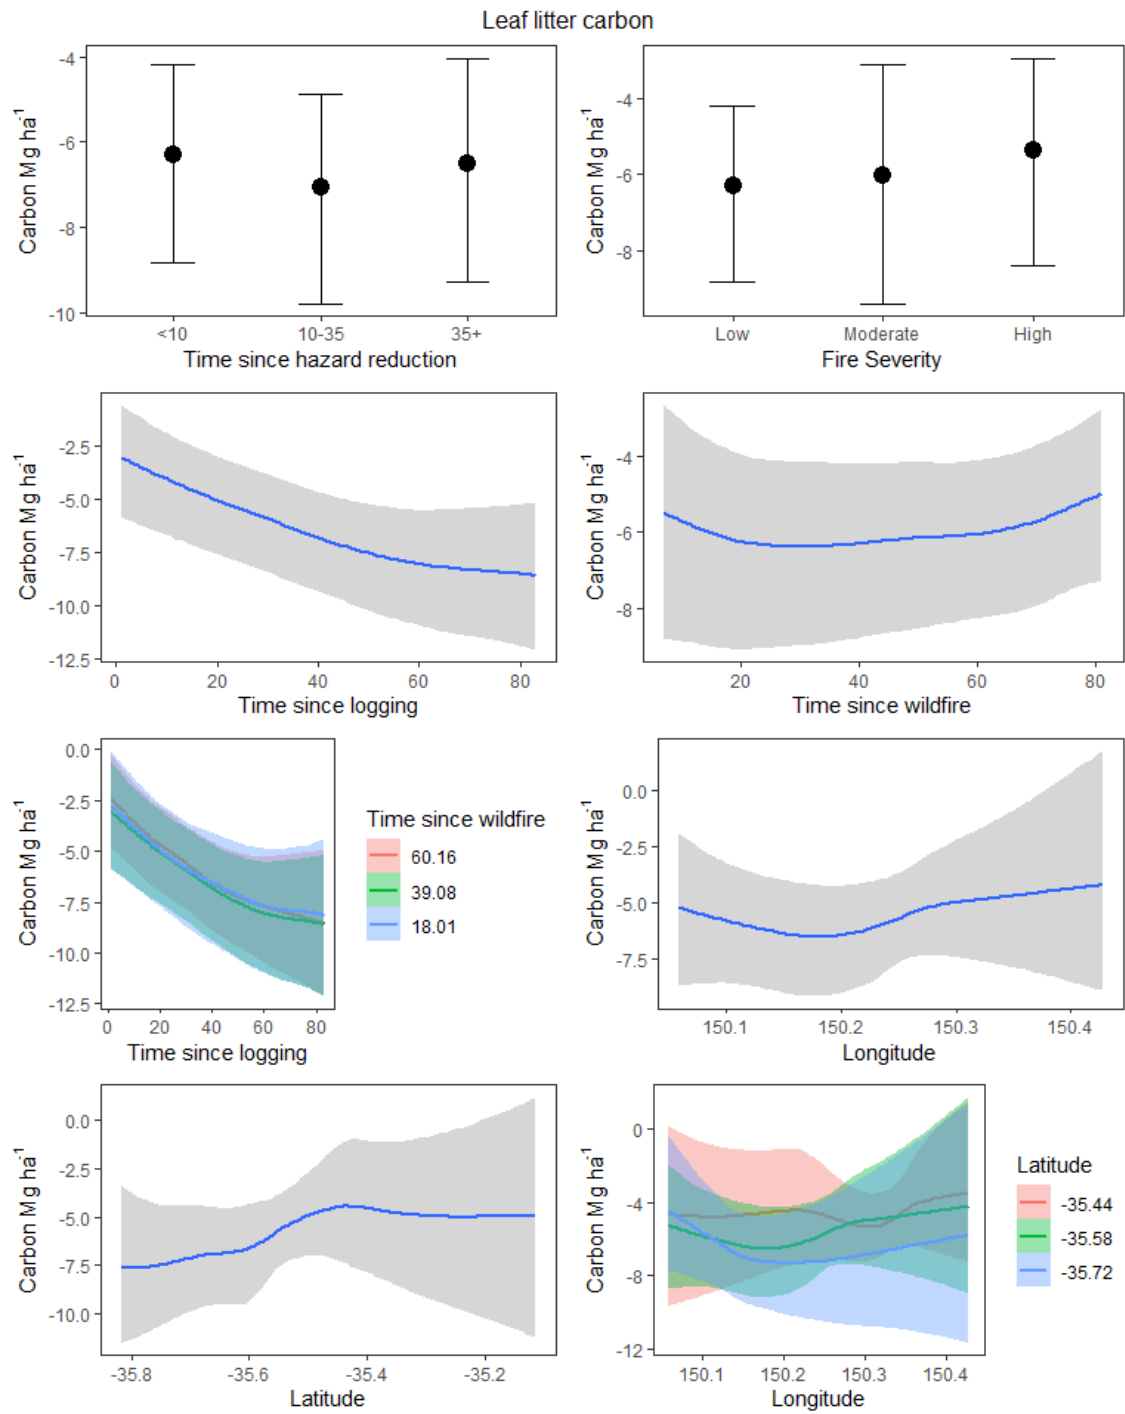

Supplement: s1 [file s1]
